# Supplementary material for: Evaluation of mental disorder with prioritization of its type by utilizing the bipolar complex fuzzy decision-making approach based on Schweizer-Sklar prioritized aggregation operators
Source: PeerJ Comput Sci. 2023 Nov 7;9:e1434. doi: 10.7717/peerj-cs.1434 (PMC13011981; doi:10.7717/peerj-cs.1434)
Supplement: Supplemental Information 2 [file peerj-cs-09-1434-s002.xlsx]

## Sheet: All formulas 
We used the following formulas in this script.
